# Supplementary material for: Surface modification of carbon catalysts for efficient production of H2O2 in bioelectrochemical systems
Source: Royal Society of Chemistry journal article supplement (doi:10.1039/d2ew00418f), 2022-01-01
Supplement: d2ew00418f1.pdf [file d2ew00418f1.pdf]

## Supporting Information

### Surface modification of carbon catalysts for efficient production of H<sub>2</sub>O<sub>2</sub> in bioelectrochemical systems

Hyunji Eom<sup>1,2†</sup>, Eunjin Jwa<sup>1†</sup>, Yoon-Cheul Jeung<sup>1</sup>, Kyo Sik Hwang<sup>1</sup>, Namjo Jeong<sup>1</sup>,  
Youngsun Mok<sup>2\*</sup>, Joo-Youn Nam<sup>1\*</sup>

<sup>1</sup>Marine Energy Convergence and Integration Research Team, Jeju Global Research Center,  
Korea Institute of Energy Research, 200 Haemajihae-an-ro, Gujwa-eup, Jeju, 63357, Korea

<sup>2</sup>Department of Chemical & Biological Engineering, Jeju National University, 102  
Jejudaehak-ro, Jeju 63243, Korea

<sup>†</sup>Both authors are contributed equally to this work.

#### \*Corresponding Author

Phone: +82-64-800-2255, Fax: +82-64-805-2204, E-mail: [jynam@kier.re.kr](mailto:jynam@kier.re.kr)

Phone: +82-64-754-3682, Fax: +82-64-755-3670, E-mail: [smokie@jejunu.ac.kr](mailto:smokie@jejunu.ac.kr)

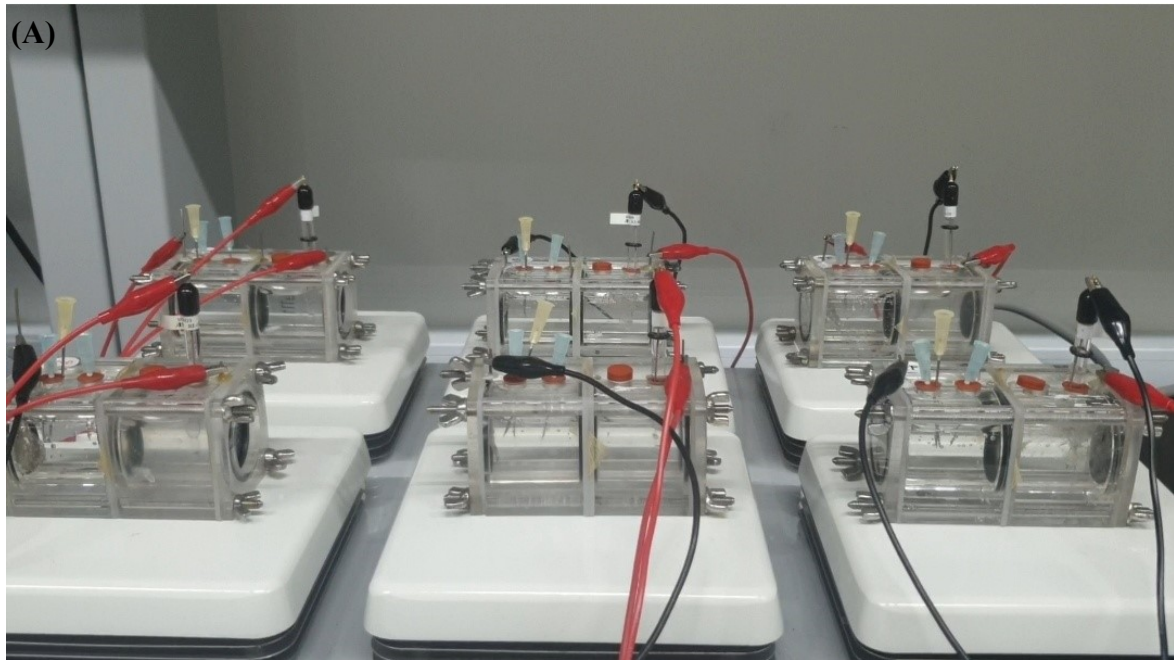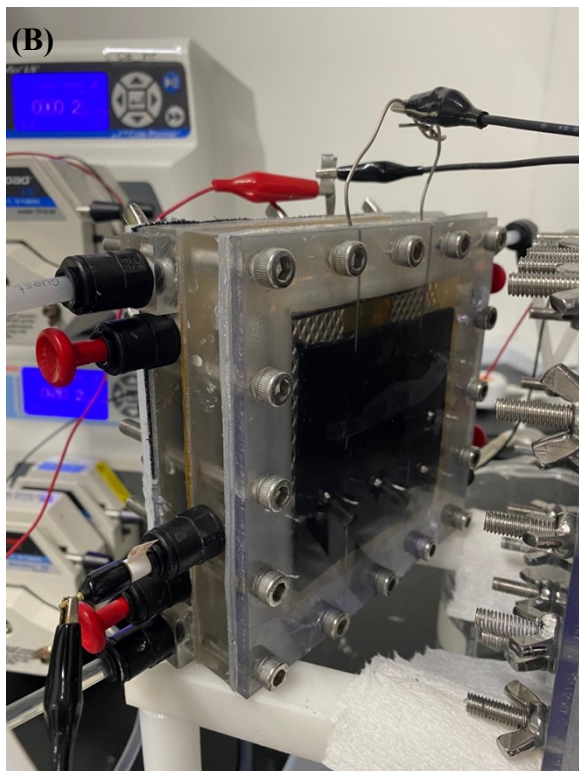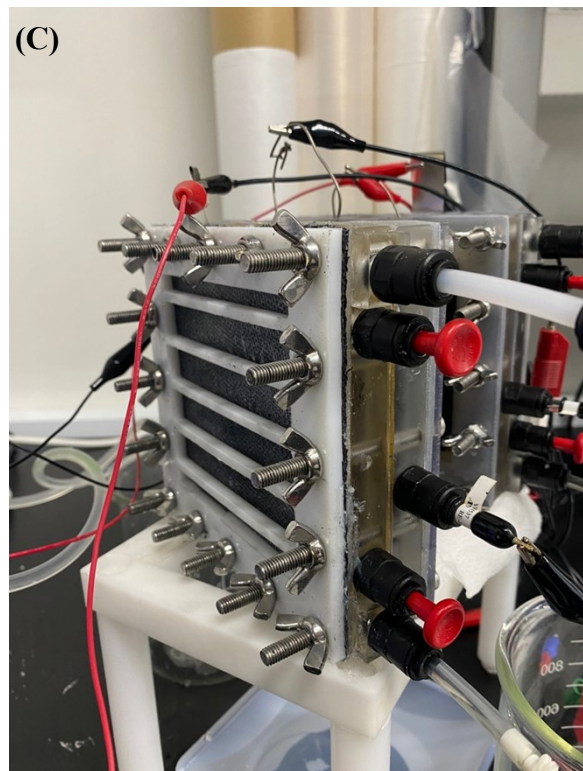

**Figure S1.** Images of experimental set-up (A) abiotic half-cell reactors, (B) Anode chamber of BES (C) Cathode chamber of BES

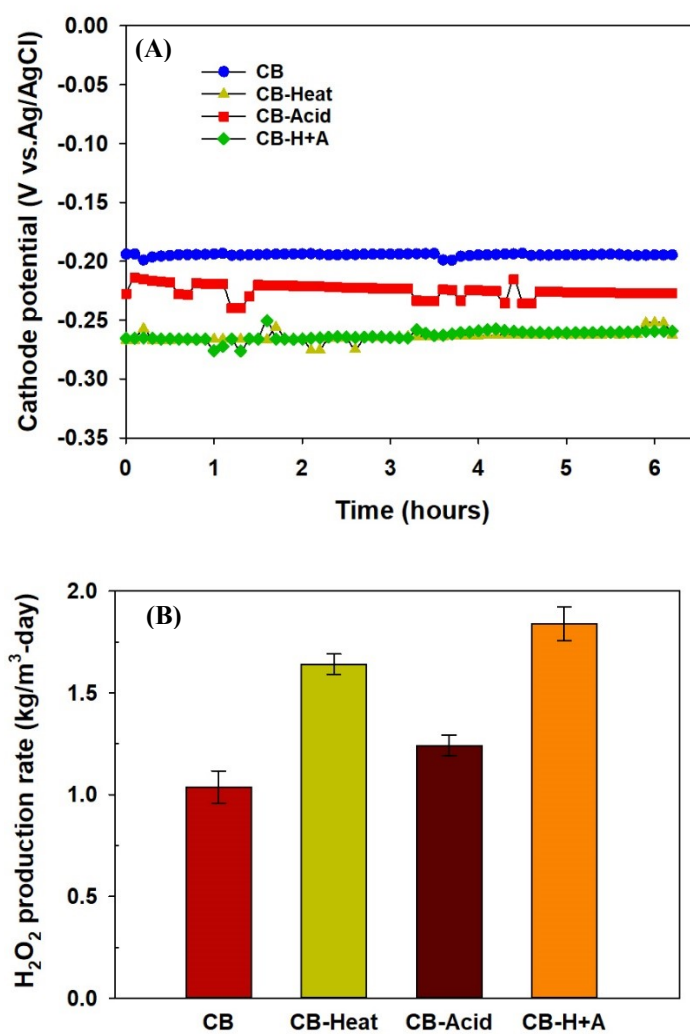

**Figure S2.** Comparison of differently modified carbon powders for H<sub>2</sub>O<sub>2</sub> production (A) cathode potentials at -3mA (B) H<sub>2</sub>O<sub>2</sub> production rates

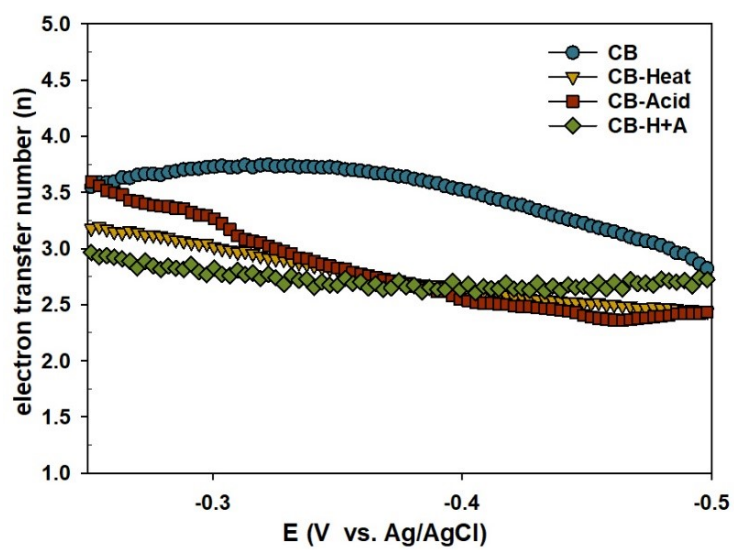

**Figure S3.** The calculated number of transferred electrons via RRDE measurement

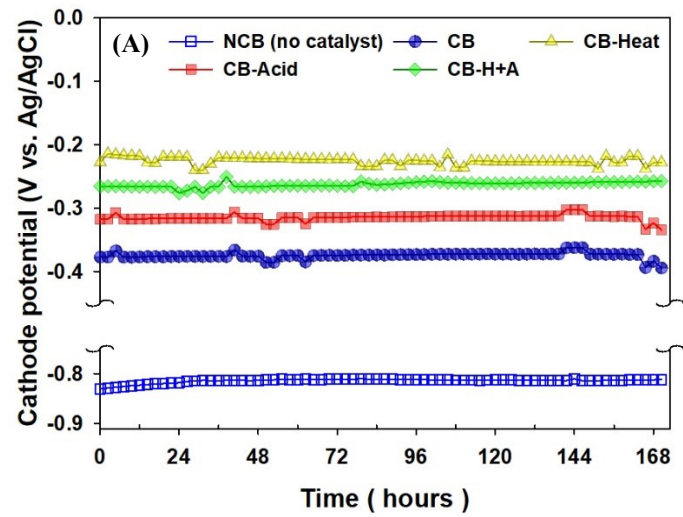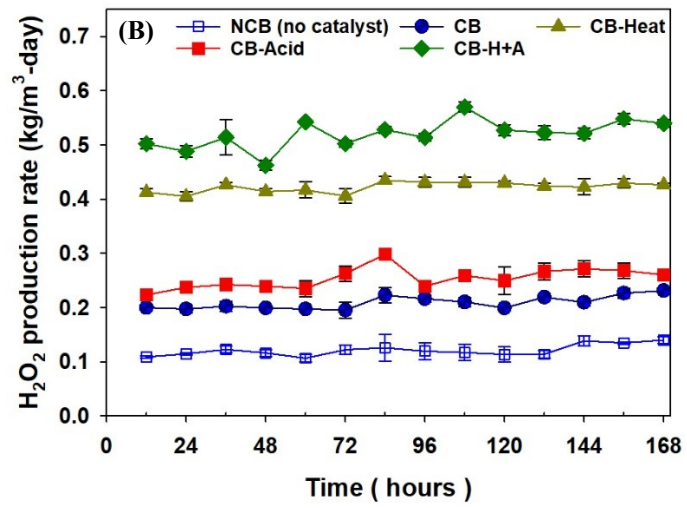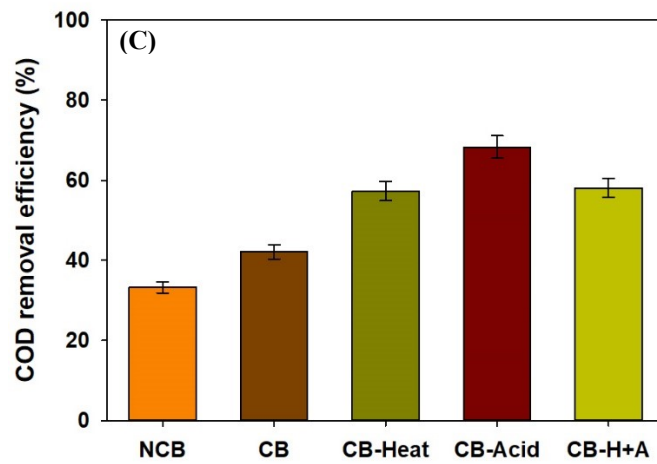

**Figure S4.** (A) Cathode potentials during H<sub>2</sub>O<sub>2</sub> production (B) H<sub>2</sub>O<sub>2</sub> production rates in continuous-flow BES (C) COD removal efficiency
